# Supplementary material for: Coastal resilience in the face of increasing wildfires: a land-sea perspective
Source: Research Square preprint supplement (doi:10.21203/rs.3.rs-5595849/v1), 2024-12-24
Supplement: Supplementary file 2 [file c65aca9d37251a5280483cae.xlsx]

## Sheet: read me
Table of contents
1. Data summarized per marineecoregion of the world including fire weather index sums for years 2023 and 2100, percent cover marine biodiversity hotspots, global population count totals for years 2023 and 2100, commercial demersal fishing sums, and coastal indigenous seafood consumption sums
2. Fire weather index data sorting into 4 groups for vulnerability score classification
3. Global population count data sorting into 4 groups for vulnerability score classification
4. Commercial demersal fishing data sorting into 4 groups for vulnerability score classification
5. Marine biodiversity hotspots percent cover data sorting into 4 groups for vulnerability score classification
6. ICVI calculations including overview of all datasets, their respective vulnerability scores, the PVI and SVI calculations
7. ICVI results compared with coastal indigenous seafood consumption data

## Sheet: 1 Data summary per marine ecore
Marine ecoregion FID	Marine ecoregion of the world	Bordering country	2023 fire weather index sum	2100 fire weather index sum	Percent cover marine biodiversity hotspot	2020 population count sum (number of persons)	2100 population count sum (number of persons)	Commercial demersal fishing sum (tons fish/tons C/km2)	ICVI 2023	ICVI 2100	Change in ICVI between 2023 and 2100	Coastal indigenous seafood consumption sum (tons/year)	Coastal indigenous seafood consumption data grouping (tons/year)
0	Agulhas Bank	South Africa	45722	80929	0	182434	137622	29161	1	2	1 to 2	0	0 to 1,000
1	Aleutian Islands	USA	0	71	0	1692	15	154104	1	1	No change	32	0 to 1,000
2	Amazonia	Brazil	88586	320431	0	577312	1116290	245698	2	3	2 to 3	0	0 to 1,000
3	Andaman Sea Coral Coast	India	121893	368473	96.3518	587522	315210	1194916	3	4	3 to 4	0	0 to 1,000
4	Arabian (Persian) Gulf	Iran	2046799	2355597	0	2330441	2692759	142801	3	3	No change	2447	1,000 to 2,500
5	Araucanian	Chile	47106	92975	98.86	183921	153924	28453	2	2	No change	6480	>5,000
6	Arnhem Coast to Gulf of Carpenteria	Australia	711384	1002369	0.0888	10734	1463	220250	3	3	No change	1899	1,000 to 2,500
7	Arafura Sea	Indonesia	11540	42568	0.779254	29730	23430	843586	2	2	No change	0	0 to 1,000
8	Baffin Bay - Davis Strait	Canada	989	59792	0	89	106	93154	1	1	No change	107	0 to 1,000
9	Bahamian	Bahamas	172326	341649	69.8956	168376	131779	45791	2	2	No change	0	0 to 1,000
10	Baltic Sea	Sweden	93795	386542	0	1117218	1154089	19221	2	3	2 to 3	0	0 to 1,000
11	Banda Sea	Indonesia	106043	437893	97.6607	793245	689775	983802	3	4	3 to 4	32	0 to 1,000
12	Bassian	Australia	45932	118913	0	174888	251290	24878	1	2	1 to 2	0	0 to 1,000
13	Beaufort-Amundsen-Viscount Melville-Queen Maud	Canada	9668	416970	0	1846	215	146	1	2	1 to 2	285	0 to 1,000
14	Beaufort Sea - continental coast and shelf	USA	18396	81287	0	388	2	45	1	2	1 to 2	352	0 to 1,000
15	Bismarck Sea	Papua New Guinea	0	49419	57.8624	134789	109904	31593	2	2	No change	1	0 to 1,000
16	Black Sea	Turkey	174903	489120	0	471140	741704	21052	2	3	2 to 3	7611	>5,000
17	Bonaparte Coast	Australia	701803	942225	8.3851	8932	19533	331185	3	3	No change	667	0 to 1,000
18	Cape Howe	Australia	35740	85585	0	27133	12153	19378	1	2	1 to 2	36	0 to 1,000
19	Carolinian	USA	11170	31389	0	135206	185628	93465	1	1	No change	155	0 to 1,000
20	Celtic Seas	UK	15356	96232	0	836225	1228508	1167917	2	3	2 to 3	0	0 to 1,000
21	Central Chile	Chile	185937	256922	98.6831	41226	90897	18749	2	2	No change	0	0 to 1,000
22	Central Kuroshio Current	Japan	14061	105589	3.8e-05	3136265	1609514	521574	3	3	No change	0	0 to 1,000
23	Central New Zealand	New Zealand	22986	54533	98.0399	136020	185996	282304	2	2	No change	42734	>5,000
24	Central Peru	Peru	73638	78305	0	671495	317091	98026	2	2	No change	70	0 to 1,000
25	Central Somali Coast	Somalia	243524	270154	6.66533	2742	5786	20495	2	2	No change	0	0 to 1,000
26	Channels and Fjords of Southern Chile	Chile	15667	66291	0.764258	14852	683	231098	2	2	No change	291	0 to 1,000
27	Chiapas-Nicaragua	Mexico	85307	147940	98.9198	186299	213515	116234	2	2	No change	5360	>5,000
28	Chiloense	Chile	0	47109	78.0232	65269	38732	131434	2	2	No change	1163	1,000 to 2,500
29	Chukchi Sea	USA	964	63006	0	554	2	120	1	1	No change	1279	1,000 to 2,500
30	Cortezian	Mexico	899359	1174207	25.2168	331910	122216	90000	3	3	No change	2968	2,500 to 5,000
31	Delagoa	Mozambique	52934	122993	0	133338	376567	34904	1	2	1 to 2	0	0 to 1,000
32	East China Sea	China	57449	214859	41.9337	10851110	4412854	4392014	3	3	No change	0	0 to 1,000
33	East Greenland Shelf	Greenland	56	73890	0	781	0	189408	1	1	No change	486	0 to 1,000
34	East Siberian Sea	Russia	303	37750	0	0	0	2	1	1	No change	0	0 to 1,000
35	Eastern Bering Sea	USA	0	66557	0	6715	561	5358271	2	2	No change	644	0 to 1,000
36	Eastern Brazil	Brazil	9219	56754	0	1333710	2655428	286373	2	2	No change	473	0 to 1,000
37	Eastern India	India	141072	194481	0	639635	1984781	827983	3	3	No change	189	0 to 1,000
38	Eastern Philippines	Philippines	109570	545987	68.4537	8380233	6929735	926653	3	4	3 to 4	855	0 to 1,000
39	Exmouth to Broome	Australia	628645	813934	2.02268	20369	357	231834	3	3	No change	508	0 to 1,000
40	Fiji Islands	Fiji	48132	110024	75.3656	98444	52492	14210	2	2	No change	25239	>5,000
41	Floridian	USA	46198	93720	0	782643	1075033	87968	2	2	No change	2087	1,000 to 2,500
42	Great Australian Bight	Australia	190193	269565	0	880	0	34957	2	2	No change	0	0 to 1,000
43	Guayaquil	Ecuador	47826	56621	68.9412	535461	139299	134735	2	2	No change	0	0 to 1,000
44	Guianan	Venezuela	17167	140022	0	157572	77066	100634	1	2	1 to 2	4860	2,500 to 5,000
45	Gulf of Aden	Yemen	676532	752122	65.7882	452749	535899	148686	3	3	No change	83	0 to 1,000
46	Gulf of Alaska	USA	0	8271	0	1389	1709	299219	2	2	No change	299	0 to 1,000
47	Gulf of Guinea Central	Nigeria	10921	40113	0	2084795	4827466	341522	2	2	No change	237029	>5,000
48	Gulf of Guinea Upwelling	Cote D'Ivoire	4296	17388	0	1036415	872517	131689	2	2	No change	72715	>5,000
49	Gulf of Guinea West	Liberia	241730	322894	0	500728	450251	138921	3	3	No change	112637	>5,000
50	Gulf of Maine/Bay of Fundy	USA	3063	35799	0	208946	308845	228137	2	2	No change	673	0 to 1,000
51	Gulf of Oman	Iran	439855	515418	0	35829	57994	183943	2	2	No change	0	0 to 1,000
52	Gulf of Papua	Papua New Guinea	883	12643	0	3091	6887	6642	1	1	No change	55932	>5,000
53	Gulf of St. Lawrence - Eastern Scotian Shelf	Canada	13223	46349	0	139070	137619	265785	2	2	No change	4358	2,500 to 5,000
54	Gulf of Thailand	Thailand	73234	218610	96.0117	813496	417503	913081	3	3	No change	36110	>5,000
55	Gulf of Tonkin	Vietnam	57793	171326	96.2639	2988433	1509174	1424961	3	4	3 to 4	29546	>5,000
56	Halmahera	Indonesia	3352	100054	77.0052	397241	259691	195155	2	3	2 to 3	22621	>5,000
57	Hawaii	USA	27486	57843	86.5666	132371	157894	13260	2	2	No change	10464	>5,000
58	Houtman	Australia	80234	116849	0	1292	2960	6211	2	2	No change	28	0 to 1,000
59	Hudson Complex	Canada	753	281350	0	10194	3858	2788	1	2	1 to 2	1559	1,000 to 2,500
60	Humboldtian	Peru	280530	330036	89.3808	600558	697982	150316	3	3	No change	155	0 to 1,000
61	Kamchatka Shelf and Coast	Russia	0	9078	0	2243	0	298512	2	2	No change	731	0 to 1,000
62	Kara Sea	Russia	0	106941	0	0	0	111	1	2	1 to 2	22	0 to 1,000
63	Lancaster Sound	Canada	0	133175	0	0	18	1649	1	2	1 to 2	76	0 to 1,000
64	Laptev Sea	Russia	0	68354	0	0	0	0	1	1	No change	2712	2,500 to 5,000
65	Leeuwin	Australia	164884	273294	0	83361	54108	18579	2	2	No change	7	0 to 1,000
66	Lesser Sunda	Indonesia	239621	575849	65.0659	1173864	822390	507320	3	3	No change	12495	>5,000
67	Magdalena Transition	Mexico	148943	186242	0	5481	1215	21655	2	2	No change	0	0 to 1,000
68	Malacca Strait	Indonesia	614	24460	91.5834	3294455	2368961	985984	3	3	No change	0	0 to 1,000
69	Malvinas/Falklands	Falkland Islands	20162	41485	0	105	3	164175	1	1	No change	0	0 to 1,000
70	Manning-Hawkesbury	Australia	6859	20859	0	114456	99421	21246	1	1	No change	63	0 to 1,000
71	Mexican Tropical Pacific	Mexico	78138	120465	92.9834	326994	95554	118684	3	2	3 to 2	3359	2,500 to 5,000
72	Namaqua	South Africa	202987	259837	0	40483	23502	27883	2	2	No change	0	0 to 1,000
73	Namib	Namibia	252389	306045	0	3398	4589	56924	2	2	No change	0	0 to 1,000
74	Natal	South Africa	20848	41159	0	174256	167568	18443	1	1	No change	29	0 to 1,000
75	New Caledonia	New Caledonia	66843	110851	32.4765	43075	54289	16222	1	2	1 to 2	4322	2,500 to 5,000
76	Nicoya	Costa Rica	10405	44387	98.9385	42340	66807	103323	2	2	No change	0	0 to 1,000
77	Ningaloo	Australia	43592	59319	0	164	0	3390	1	1	No change	0	0 to 1,000
78	North American Pacific Fijordland	Canada	0	6421	0	20566	28892	89227	1	1	No change	2169	1,000 to 2,500
79	North Greenland	Greenland	11730	134942	0	0	0	116866	1	2	1 to 2	130	0 to 1,000
80	North Patagonian Gulfs	Argentina	236296	325697	0	8582	3396	278512	3	3	No change	0	0 to 1,000
81	Northeast Sulawesi	Indonesia	3534	52947	89.8489	121948	71827	123324	2	2	No change	0	0 to 1,000
82	Northeastern Brazil	Brazil	97519	179388	0	1020079	1042269	517296	3	3	No change	12	0 to 1,000
83	Northeastern Honshu	Japan	0	7186	48.1428	152053	77097	132495	1	1	No change	0	0 to 1,000
84	Northeastern New Zealand	New Zealand	21637	43564	98.5409	90027	89735	26001	2	2	No change	0	0 to 1,000
85	Northern and Central Red Sea	Saudi Arabia	1805658	2034842	7.99901	271009	83819	134106	2	2	No change	0	0 to 1,000
86	Northern Bay of Bengal	Burma	338717	525128	32.6496	2851835	2568617	1102572	4	4	No change	77755	>5,000
87	Northern California	USA	95618	142917	39.2315	381150	570723	136353	2	2	No change	60	0 to 1,000
88	Northern Grand Banks - Southern Labrador	Canada	0	20240	0	36156	42123	508163	2	2	No change	164	0 to 1,000
89	Northern Gulf of Mexico	USA	129343	304352	0.154069	369443	546167	156207	2	3	2 to 3	1428	1,000 to 2,500
90	Northern Labrador	Canada	0	28144	0	256	75	282541	2	2	No change	423	0 to 1,000
91	Oregon, Washington, Vancouver Coast and Shelf	USA	23113	56274	3.18238	147459	151449	50832	1	1	No change	1900	1,000 to 2,500
92	Oyashio Current	Russia	0	13856	2.85915	7754	3737	771605	2	2	No change	0	0 to 1,000
93	Palawan/North Borneo	Philippines	64568	337792	0	1853299	1699692	1204541	3	4	3 to 4	1795	1,000 to 2,500
94	Panama Bight	Colombia	573	14960	98.3824	121420	74008	141672	2	2	No change	294	0 to 1,000
95	Papua	Indonesia	0	50407	0.498072	115467	60929	388658	2	2	No change	380	0 to 1,000
96	Patagonian Shelf	Argentina	61123	109535	0	2053	458	1072844	2	3	2 to 3	0	0 to 1,000
97	Puget Trough/Georgia Basin	Canada	12479	62126	0	433758	691436	4401	2	2	No change	2570	2,500 to 5,000
98	Rio de la Plata	Uruguay	17133	39561	0	513151	86965	19656	2	1	2 to 1	0	0 to 1,000
99	Rio Grande	Brazil	1304	12243	0	285972	201371	73042	1	1	No change	11916	>5,000
100	Saharan Upwelling	Morocco	476557	586954	70.1502	676980	701059	294845	3	3	No change	0	0 to 1,000
101	Scotian Shelf	Canada	3342	17136	0	50387	59268	145580	1	1	No change	93	0 to 1,000
102	Sea of Japan	Russia	13062	93792	32.5049	914997	663781	1295666	3	3	No change	3117	2,500 to 5,000
103	Sea of Okhotsk	Russia	709	51262	2.8002	11355	5737	6249191	2	2	No change	7048	>5,000
104	Shark Bay	Australia	268432	356676	0	0	0	7253	2	2	No change	6	0 to 1,000
105	Solomon Archipelago	Solomon Islands	0	41433	61.3892	222442	195172	38493	2	2	No change	11002	>5,000
106	Solomon Sea	Papua New Guinea	9924	44514	22.8483	76421	74748	26993	1	1	No change	0	0 to 1,000
107	South Australian Gulfs	Australia	278995	432971	0	46294	55015	22528	2	2	No change	0	0 to 1,000
108	South European Atlantic Shelf	France	86575	232174	27.9392	880531	919609	332596	2	3	2 to 3	0	0 to 1,000
109	South India and Sri Lanka	Sri Lanka	112160	171226	0	1089956	1566670	573440	3	3	No change	0	0 to 1,000
110	South Kuroshio	Japan	28511	76620	64.1995	494844	307338	1121426	3	3	No change	0	0 to 1,000
111	Southeast Madagascar	Madagascar	12178	40138	91.1173	32322	76187	83237	2	2	No change	47141	>5,000
112	Southeast Papua New Guinea	Papua New Guinea	820	10155	0	50895	67895	3074	1	1	No change	0	0 to 1,000
113	Southeastern Brazil	Brazil	4243	25166	0	1792891	1712892	143388	2	2	No change	28	0 to 1,000
114	Southern California Bight	Mexico	358284	448374	41.2305	321461	508219	61406	3	3	No change	593	0 to 1,000
115	Southern Caribbean	Venezuela	174583	429160	52.721	444216	431651	94261	2	3	2 to 3	29774	>5,000
116	Southern China	China	59893	162811	62.2726	7710824	4277447	2257631	3	3	No change	0	0 to 1,000
117	Southern Grand Banks - South Newfoundland	Canada	0	7381	0	5771	7675	405544	2	2	No change	202	0 to 1,000
118	Southern Gulf of Mexico	Mexico	51351	144276	22.1087	248356	112123	428012	2	2	No change	20506	>5,000
119	Southern New Zealand	New Zealand	219	1710	98.7678	20862	38189	111393	2	2	No change	0	0 to 1,000
120	Southern Red Sea	Saudi Arabia	1647635	1896230	90.1417	391313	715555	60362	3	3	No change	25855	>5,000
121	Southern Vietnam	Vietnam	38101	120809	96.1451	1446311	936124	843090	3	4	3 to 4	0	0 to 1,000
122	Southwestern Caribbean	Colombia	26670	101084	38.7111	506105	241178	75527	2	2	No change	7435	>5,000
123	Sulawesi Sea/Makassar Strait	Indonesia	38160	211450	0	1107195	739922	1162878	3	3	No change	3471	2,500 to 5,000
124	East African Coral Coast	Tanzania	156800	274022	1.83286	719235	1707928	103753	2	3	2 to 3	218186	>5,000
125	Northern Monsoon Current Coast	Somalia	83375	104340	0	101931	441924	12195	2	2	No change	6019	>5,000
126	Bight of Sofala/Swamp Coast	Mozambique	50875	114917	0	116096	208013	45330	1	2	1 to 2	0	0 to 1,000
127	Three Kings-North Cape	New Zealand	2419	3611	99.8933	0	136	20285	2	2	No change	0	0 to 1,000
128	Tweed-Moreton	Australia	23412	61232	0	180611	258264	23386	1	1	No change	282	0 to 1,000
129	Uruguay-Buenos Aires Shelf	Argentina	89207	133948	0	10733	10285	359563	2	2	No change	0	0 to 1,000
130	Vanuatu	Vanuatu	31321	67051	47.7103	103294	77844	9806	1	1	No change	3773	2,500 to 5,000
131	Virginian	USA	28770	100367	0	2181293	3522022	356500	2	3	2 to 3	712	0 to 1,000
132	West Greenland Shelf	Greenland	0	25432	0	7291	3560	619718	2	2	No change	8100	>5,000
133	Western and Northern Madagascar	Madagascar	214413	399622	88.2628	344257	417012	215156	3	3	No change	43168	>5,000
134	Western Arabian Sea	Oman	458299	539795	44.4794	27448	34842	79232	3	3	No change	18	0 to 1,000
135	Western Bassian	Australia	45609	84991	0	2684	4146	24048	1	2	1 to 2	0	0 to 1,000
136	Western Caribbean	Mexico	40971	143440	98.4915	177955	141205	141936	2	2	No change	18494	>5,000
137	Western India	India	557746	655723	0	7689485	8261492	1693786	4	4	No change	741427	>5,000
138	Yellow Sea	China	212010	456083	0	4294816	1343009	1716692	3	4	3 to 4	0	0 to 1,000
139	Southern Java	Indonesia	11018	74107	80.1606	1584173	608823	276485	3	2	3 to 2	553	0 to 1,000
140	Western Sumatra	Indonesia	4828	38843	86.3365	375717	373956	562447	3	3	No change	45	0 to 1,000
141	Torres Strait Northern Great Barrier Reef	Australia	118786	184108	0	4345	2395	17032	2	2	No change	345	0 to 1,000
142	Central and Southern Great Barrier Reef	Australia	162088	342104	0	29068	24877	23945	2	2	No change	625	0 to 1,000
143	Sunda Shelf/Java Sea	Indonesia	33691	287843	0	2740980	2196146	6946093	3	4	3 to 4	0	0 to 1,000
144	North and East Iceland	Iceland	0	3407	0	463	27	333989	2	2	No change	0	0 to 1,000
145	South and West Iceland	Iceland	0	16386	0	19287	32552	670105	2	2	No change	0	0 to 1,000
146	North Sea	UK	52134	212191	0	1399563	1685653	1974488	3	3	No change	0	0 to 1,000
147	Southern Norway	Norway	0	5956	0	206561	271819	468927	2	2	No change	0	0 to 1,000
148	Northern Norway and Finnmark	Norway	0	21385	0	25593	38189	397325	2	2	No change	9997	>5,000
149	North and East Barents Sea	Russia	47	158022	0	0	0	1595385	2	3	2 to 3	0	0 to 1,000
150	White Sea	Russia	0	39498	0	12434	31	19337	1	1	No change	0	0 to 1,000
151	Greater Antilles	Cuba	290747	775977	88.8963	1437830	992653	141851	3	3	No change	0	0 to 1,000
152	Gulf of Guinea South	Gabon	21340	40310	0	34569	42760	53263	1	1	No change	0	0 to 1,000
153	Angolan	Angola	93271	128643	0	496663	274577	279442	2	2	No change	7659	>5,000
154	Sahelian Upwelling	Mauritania	333464	385051	0	351117	855771	102893	3	3	No change	29580	>5,000
155	Adriatic Sea	Italy	90795	301305	93.6652	782630	429620	129339	3	3	No change	0	0 to 1,000
156	Levantine Sea	Egypt	445264	634512	97.303	2827621	2677782	88770	4	4	No change	0	0 to 1,000
157	Tunisian Plateau/Gulf of Sidra	Libya	366965	508421	0	403133	306138	80800	3	2	3 to 2	0	0 to 1,000
158	Ionian Sea	Italy	231722	423866	96.2814	381409	157516	93423	3	3	No change	0	0 to 1,000
159	Aegean Sea	Greece	1048001	1781435	91.4787	1150992	805357	268804	4	3	4 to 3	0	0 to 1,000
160	Alboran Sea	Spain	114037	201745	86.5923	411935	301819	39053	3	2	3 to 2	0	0 to 1,000
161	Western Mediterranean	Italy	369127	761288	96.3214	2851048	2524769	166631	4	4	No change	0	0 to 1,000

## Sheet: 2 Fire weather index
Marine ecoregion FID	Fire weather index year 2023 summed by marine ecoregion		Unique FWI 2023 sum values	Number of marine ecoregions containing the associated FWI sum		Quartile label	Quartile calculation			Vulnerability scores	Grouping for vulnerability score	Groups divisions	Number of raster pixels in each group	% pixels in each group
0	45722		45722	1		1	3711.25		# desired bins			-211185	0	#DIV/0!
1	0		0	23		2	42281.5		4	1 = Very Low	0 to 75,343	-67920.8	101	#DIV/0!
2	88586		88586	1		3	146975			2 = Low	75,343 to 218,607	75343.2	32	#DIV/0!
3	121893		121893	1		4	2046799		bin width	3 = High	218,607 to 361,871	218607	13	#DIV/0!
4	2046799		2046799	1		IQR	143264		143264	4 = Very High	361,871+	361871	16	#DIV/0!
5	47106		47106	1
6	711384		711384	1		Outlier thresholds
7	11540		11540	1		Upper bound	361871
8	989		989	1		Lower bound	-211185
9	172326		172326	1
10	93795		93795	1
11	106043		106043	1
12	45932		45932	1
13	9668		9668	1
14	18396		18396	1
15	0		174903	1
16	174903		701803	1
17	701803		35740	1
18	35740		11170	1
19	11170		15356	1
20	15356		185937	1
21	185937		14061	1
22	14061		22986	1
23	22986		73638	1
24	73638		243524	1
25	243524		15667	1
26	15667		85307	1
27	85307		964	1
28	0		899359	1
29	964		52934	1
30	899359		57449	1
31	52934		56	1
32	57449		303	1
33	56		9219	1
34	303		141072	1
35	0		109570	1
36	9219		628645	1
37	141072		48132	1
38	109570		46198	1
39	628645		190193	1
40	48132		47826	1
41	46198		17167	1
42	190193		676532	1
43	47826		10921	1
44	17167		4296	1
45	676532		241730	1
46	0		3063	1
47	10921		439855	1
48	4296		883	1
49	241730		13223	1
50	3063		73234	1
51	439855		57793	1
52	883		3352	1
53	13223		27486	1
54	73234		80234	1
55	57793		753	1
56	3352		280530	1
57	27486		164884	1
58	80234		239621	1
59	753		148943	1
60	280530		614	1
61	0		20162	1
62	0		6859	1
63	0		78138	1
64	0		202987	1
65	164884		252389	1
66	239621		20848	1
67	148943		66843	1
68	614		10405	1
69	20162		43592	1
70	6859		11730	1
71	78138		236296	1
72	202987		3534	1
73	252389		97519	1
74	20848		21637	1
75	66843		1805658	1
76	10405		338717	1
77	43592		95618	1
78	0		129343	1
79	11730		23113	1
80	236296		64568	1
81	3534		573	1
82	97519		61123	1
83	0		12479	1
84	21637		17133	1
85	1805658		1304	1
86	338717		476557	1
87	95618		3342	1
88	0		13062	1
89	129343		709	1
90	0		268432	1
91	23113		9924	1
92	0		278995	1
93	64568		86575	1
94	573		112160	1
95	0		28511	1
96	61123		12178	1
97	12479		820	1
98	17133		4243	1
99	1304		358284	1
100	476557		174583	1
101	3342		59893	1
102	13062		51351	1
103	709		219	1
104	268432		1647635	1
105	0		38101	1
106	9924		26670	1
107	278995		38160	1
108	86575		156800	1
109	112160		83375	1
110	28511		50875	1
111	12178		2419	1
112	820		23412	1
113	4243		89207	1
114	358284		31321	1
115	174583		28770	1
116	59893		214413	1
117	0		458299	1
118	51351		45609	1
119	219		40971	1
120	1647635		557746	1
121	38101		212010	1
122	26670		11018	1
123	38160		4828	1
124	156800		118786	1
125	83375		162088	1
126	50875		33691	1
127	2419		52134	1
128	23412		47	1
129	89207		290747	1
130	31321		21340	1
131	28770		93271	1
132	0		333464	1
133	214413		90795	1
134	458299		445264	1
135	45609		366965	1
136	40971		231722	1
137	557746		1048001	1
138	212010		114037	1
139	11018		369127	1
140	4828
141	118786
142	162088
143	33691
144	0
145	0
146	52134
147	0
148	0
149	47
150	0
151	290747
152	21340
153	93271
154	333464
155	90795
156	445264
157	366965
158	231722
159	1048001
160	114037
161	369127

## Sheet: 3 Global population count
Marine ecoregion FID	Global population count year 2020 summed by marine ecoregion		Unique population 2020 sum values	Number of marine ecoregions containing the associated population sum		Quartile label	Quartile calculation			Vulnerability scores	Grouping for vulnerability score	Groups divisions	Number of pixels in each group	% pixels in each group
0	182434		182434	1		1	15960.8		# desired bins			-856047	0	#DIV/0!
1	1692		1692	1		2	154812		4	1 = Very Low	0 to 306,630	-274708	93	#DIV/0!
2	577312		577312	1		3	597299			2 = Low	306,630 to 887,968	306630	30	#DIV/0!
3	587522		587522	1		4	10851110		bin width	3 = High	887,968 to 1,469,306	887968	10	#DIV/0!
4	2330441		2330441	1		IQR	581338		581338	4 = Very High	1,469,306+	1.46931e+06	16	#DIV/0!
5	183921		183921	1
6	10734		10734	1		Outlier thresholds
7	29730		29730	1		Upper bound	1.46931e+06
8	89		89	1		Lower bound	-856047
9	168376		168376	1
10	1117218		1117218	1
11	793245		793245	1
12	174888		174888	1
13	1846		1846	1
14	388		388	1
15	134789		134789	1
16	471140		471140	1
17	8932		8932	1
18	27133		27133	1
19	135206		135206	1
20	836225		836225	1
21	41226		41226	1
22	3136265		3136265	1
23	136020		136020	1
24	671495		671495	1
25	2742		2742	1
26	14852		14852	1
27	186299		186299	1
28	65269		65269	1
29	554		554	1
30	331910		331910	1
31	133338		133338	1
32	10851110		10851110	1
33	781		781	1
34	0		0	8
35	6715		6715	1
36	1333710		1333710	1
37	639635		639635	1
38	8380233		8380233	1
39	20369		20369	1
40	98444		98444	1
41	782643		782643	1
42	880		880	1
43	535461		535461	1
44	157572		157572	1
45	452749		452749	1
46	1389		1389	1
47	2084795		2084795	1
48	1036415		1036415	1
49	500728		500728	1
50	208946		208946	1
51	35829		35829	1
52	3091		3091	1
53	139070		139070	1
54	813496		813496	1
55	2988433		2988433	1
56	397241		397241	1
57	132371		132371	1
58	1292		1292	1
59	10194		10194	1
60	600558		600558	1
61	2243		2243	1
62	0		83361	1
63	0		1173864	1
64	0		5481	1
65	83361		3294455	1
66	1173864		105	1
67	5481		114456	1
68	3294455		326994	1
69	105		40483	1
70	114456		3398	1
71	326994		174256	1
72	40483		43075	1
73	3398		42340	1
74	174256		164	1
75	43075		20566	1
76	42340		8582	1
77	164		121948	1
78	20566		1020079	1
79	0		152053	1
80	8582		90027	1
81	121948		271009	1
82	1020079		2851835	1
83	152053		381150	1
84	90027		36156	1
85	271009		369443	1
86	2851835		256	1
87	381150		147459	1
88	36156		7754	1
89	369443		1853299	1
90	256		121420	1
91	147459		115467	1
92	7754		2053	1
93	1853299		433758	1
94	121420		513151	1
95	115467		285972	1
96	2053		676980	1
97	433758		50387	1
98	513151		914997	1
99	285972		11355	1
100	676980		222442	1
101	50387		76421	1
102	914997		46294	1
103	11355		880531	1
104	0		1089956	1
105	222442		494844	1
106	76421		32322	1
107	46294		50895	1
108	880531		1792891	1
109	1089956		321461	1
110	494844		444216	1
111	32322		7710824	1
112	50895		5771	1
113	1792891		248356	1
114	321461		20862	1
115	444216		391313	1
116	7710824		1446311	1
117	5771		506105	1
118	248356		1107195	1
119	20862		719235	1
120	391313		101931	1
121	1446311		116096	1
122	506105		180611	1
123	1107195		10733	1
124	719235		103294	1
125	101931		2181293	1
126	116096		7291	1
127	0		344257	1
128	180611		27448	1
129	10733		2684	1
130	103294		177955	1
131	2181293		7689485	1
132	7291		4294816	1
133	344257		1584173	1
134	27448		375717	1
135	2684		4345	1
136	177955		29068	1
137	7689485		2740980	1
138	4294816		463	1
139	1584173		19287	1
140	375717		1399563	1
141	4345		206561	1
142	29068		25593	1
143	2740980		12434	1
144	463		1437830	1
145	19287		34569	1
146	1399563		496663	1
147	206561		351117	1
148	25593		782630	1
149	0		2827621	1
150	12434		403133	1
151	1437830		381409	1
152	34569		1150992	1
153	496663		411935	1
154	351117		2851048	1
155	782630
156	2827621
157	403133
158	381409
159	1150992
160	411935
161	2851048

## Sheet: 4 Commercial demersal fishing
Marine ecoregion FID	Commercial demersal fishing summed by marine ecoregion		Unique fishing sum values	Number of marine ecoregions containing the associated fishing sum		Quartile label	Quartile calculation			Vulnerability scores	Grouping for vulnerability score	Groups divisions	Number of pixels in each group	% pixels in each group
0	29161		29161	1		1	28630		# desired bins			-457558	0	#DIV/0!
1	154104		154104	1		2	133300		4	1 = Very Low	0 to 190,693	-133433	88	#DIV/0!
2	245698		245698	1		3	352756			2 = Low	190,693 to 514,818	190693	26	#DIV/0!
3	1194916		1194916	1		4	6946093		bin width	3 = High	514,818 to 838,944	514818	7	#DIV/0!
4	142801		142801	1		IQR	324126		324126	4 = Very High	838,944+	838944	21	#DIV/0!
5	28453		28453	1
6	220250		220250	1		Outlier thresholds
7	843586		843586	1		Upper bound	838944
8	93154		93154	1		Lower bound	-457558
9	45791		45791	1
10	19221		19221	1
11	983802		983802	1
12	24878		24878	1
13	146		146	1
14	45		45	1
15	31593		31593	1
16	21052		21052	1
17	331185		331185	1
18	19378		19378	1
19	93465		93465	1
20	1167917		1167917	1
21	18749		18749	1
22	521574		521574	1
23	282304		282304	1
24	98026		98026	1
25	20495		20495	1
26	231098		231098	1
27	116234		116234	1
28	131434		131434	1
29	120		120	1
30	90000		90000	1
31	34904		34904	1
32	4392014		4392014	1
33	189408		189408	1
34	2		2	1
35	5358271		5358271	1
36	286373		286373	1
37	827983		827983	1
38	926653		926653	1
39	231834		231834	1
40	14210		14210	1
41	87968		87968	1
42	34957		34957	1
43	134735		134735	1
44	100634		100634	1
45	148686		148686	1
46	299219		299219	1
47	341522		341522	1
48	131689		131689	1
49	138921		138921	1
50	228137		228137	1
51	183943		183943	1
52	6642		6642	1
53	265785		265785	1
54	913081		913081	1
55	1424961		1424961	1
56	195155		195155	1
57	13260		13260	1
58	6211		6211	1
59	2788		2788	1
60	150316		150316	1
61	298512		298512	1
62	111		111	1
63	1649		1649	1
64	0		0	1
65	18579		18579	1
66	507320		507320	1
67	21655		21655	1
68	985984		985984	1
69	164175		164175	1
70	21246		21246	1
71	118684		118684	1
72	27883		27883	1
73	56924		56924	1
74	18443		18443	1
75	16222		16222	1
76	103323		103323	1
77	3390		3390	1
78	89227		89227	1
79	116866		116866	1
80	278512		278512	1
81	123324		123324	1
82	517296		517296	1
83	132495		132495	1
84	26001		26001	1
85	134106		134106	1
86	1102572		1102572	1
87	136353		136353	1
88	508163		508163	1
89	156207		156207	1
90	282541		282541	1
91	50832		50832	1
92	771605		771605	1
93	1204541		1204541	1
94	141672		141672	1
95	388658		388658	1
96	1072844		1072844	1
97	4401		4401	1
98	19656		19656	1
99	73042		73042	1
100	294845		294845	1
101	145580		145580	1
102	1295666		1295666	1
103	6249191		6249191	1
104	7253		7253	1
105	38493		38493	1
106	26993		26993	1
107	22528		22528	1
108	332596		332596	1
109	573440		573440	1
110	1121426		1121426	1
111	83237		83237	1
112	3074		3074	1
113	143388		143388	1
114	61406		61406	1
115	94261		94261	1
116	2257631		2257631	1
117	405544		405544	1
118	428012		428012	1
119	111393		111393	1
120	60362		60362	1
121	843090		843090	1
122	75527		75527	1
123	1162878		1162878	1
124	103753		103753	1
125	12195		12195	1
126	45330		45330	1
127	20285		20285	1
128	23386		23386	1
129	359563		359563	1
130	9806		9806	1
131	356500		356500	1
132	619718		619718	1
133	215156		215156	1
134	79232		79232	1
135	24048		24048	1
136	141936		141936	1
137	1693786		1693786	1
138	1716692		1716692	1
139	276485		276485	1
140	562447		562447	1
141	17032		17032	1
142	23945		23945	1
143	6946093		6946093	1
144	333989		333989	1
145	670105		670105	1
146	1974488		1974488	1
147	468927		468927	1
148	397325		397325	1
149	1595385		1595385	1
150	19337		19337	1
151	141851		141851	1
152	53263		53263	1
153	279442		279442	1
154	102893		102893	1
155	129339		129339
156	88770		88770
157	80800		80800
158	93423		93423
159	268804		268804
160	39053		39053
161	166631		166631

## Sheet: 5 Marine biodiversity hotspots
Marine ecoregion FID	Marine ecoregion of the world	Percent cover marine biodiversity hotspot	Vulnerability score		Vulnerability score classes	Grouping for vulnerability score
0	Agulhas Bank	0	1
1	Aleutian Islands	0	1		1 = Very Low	0% to 25%
2	Amazonia	0	1		2 = Low	25% to 50%
3	Andaman Sea Coral Coast	96.3518	4		3 = High	50% to 75%
4	Arabian (Persian) Gulf	0	1		4 = Very High	75% to 100%
5	Araucanian	98.86	4
6	Arnhem Coast to Gulf of Carpenteria	0.0888	1
7	Arafura Sea	0.779254	1
8	Baffin Bay - Davis Strait	0	1
9	Bahamian	69.8956	3
10	Baltic Sea	0	1
11	Banda Sea	97.6607	4
12	Bassian	0	1
13	Beaufort-Amundsen-Viscount Melville-Queen Maud	0	1
14	Beaufort Sea - continental coast and shelf	0	1
15	Bismarck Sea	57.8624	3
16	Black Sea	0	1
17	Bonaparte Coast	8.3851	1
18	Cape Howe	0	1
19	Carolinian	0	1
20	Celtic Seas	0	1
21	Central Chile	98.6831	4
22	Central Kuroshio Current	3.8e-05	1
23	Central New Zealand	98.0399	4
24	Central Peru	0	1
25	Central Somali Coast	6.66533	1
26	Channels and Fjords of Southern Chile	0.764258	1
27	Chiapas-Nicaragua	98.9198	4
28	Chiloense	78.0232	4
29	Chukchi Sea	0	1
30	Cortezian	25.2168	2
31	Delagoa	0	1
32	East China Sea	41.9337	2
33	East Greenland Shelf	0	1
34	East Siberian Sea	0	1
35	Eastern Bering Sea	0	1
36	Eastern Brazil	0	1
37	Eastern India	0	1
38	Eastern Philippines	68.4537	3
39	Exmouth to Broome	2.02268	1
40	Fiji Islands	75.3656	4
41	Floridian	0	1
42	Great Australian Bight	0	1
43	Guayaquil	68.9412	3
44	Guianan	0	1
45	Gulf of Aden	65.7882	3
46	Gulf of Alaska	0	1
47	Gulf of Guinea Central	0	1
48	Gulf of Guinea Upwelling	0	1
49	Gulf of Guinea West	0	1
50	Gulf of Maine/Bay of Fundy	0	1
51	Gulf of Oman	0	1
52	Gulf of Papua	0	1
53	Gulf of St. Lawrence - Eastern Scotian Shelf	0	1
54	Gulf of Thailand	96.0117	4
55	Gulf of Tonkin	96.2639	4
56	Halmahera	77.0052	4
57	Hawaii	86.5666	4
58	Houtman	0	1
59	Hudson Complex	0	1
60	Humboldtian	89.3808	4
61	Kamchatka Shelf and Coast	0	1
62	Kara Sea	0	1
63	Lancaster Sound	0	1
64	Laptev Sea	0	1
65	Leeuwin	0	1
66	Lesser Sunda	65.0659	3
67	Magdalena Transition	0	1
68	Malacca Strait	91.5834	4
69	Malvinas/Falklands	0	1
70	Manning-Hawkesbury	0	1
71	Mexican Tropical Pacific	92.9834	4
72	Namaqua	0	1
73	Namib	0	1
74	Natal	0	1
75	New Caledonia	32.4765	2
76	Nicoya	98.9385	4
77	Ningaloo	0	1
78	North American Pacific Fijordland	0	1
79	North Greenland	0	1
80	North Patagonian Gulfs	0	1
81	Northeast Sulawesi	89.8489	4
82	Northeastern Brazil	0	1
83	Northeastern Honshu	48.1428	2
84	Northeastern New Zealand	98.5409	4
85	Northern and Central Red Sea	7.99901	1
86	Northern Bay of Bengal	32.6496	2
87	Northern California	39.2315	2
88	Northern Grand Banks - Southern Labrador	0	1
89	Northern Gulf of Mexico	0.154069	1
90	Northern Labrador	0	1
91	Oregon, Washington, Vancouver Coast and Shelf	3.18238	1
92	Oyashio Current	2.85915	1
93	Palawan/North Borneo	0	1
94	Panama Bight	98.3824	4
95	Papua	0.498072	1
96	Patagonian Shelf	0	1
97	Puget Trough/Georgia Basin	0	1
98	Rio de la Plata	0	1
99	Rio Grande	0	1
100	Saharan Upwelling	70.1502	3
101	Scotian Shelf	0	1
102	Sea of Japan	32.5049	2
103	Sea of Okhotsk	2.8002	1
104	Shark Bay	0	1
105	Solomon Archipelago	61.3892	3
106	Solomon Sea	22.8483	1
107	South Australian Gulfs	0	1
108	South European Atlantic Shelf	27.9392	2
109	South India and Sri Lanka	0	1
110	South Kuroshio	64.1995	3
111	Southeast Madagascar	91.1173	4
112	Southeast Papua New Guinea	0	1
113	Southeastern Brazil	0	1
114	Southern California Bight	41.2305	2
115	Southern Caribbean	52.721	3
116	Southern China	62.2726	3
117	Southern Grand Banks - South Newfoundland	0	1
118	Southern Gulf of Mexico	22.1087	1
119	Southern New Zealand	98.7678	4
120	Southern Red Sea	90.1417	4
121	Southern Vietnam	96.1451	4
122	Southwestern Caribbean	38.7111	2
123	Sulawesi Sea/Makassar Strait	0	1
124	East African Coral Coast	1.83286	1
125	Northern Monsoon Current Coast	0	1
126	Bight of Sofala/Swamp Coast	0	1
127	Three Kings-North Cape	99.8933	4
128	Tweed-Moreton	0	1
129	Uruguay-Buenos Aires Shelf	0	1
130	Vanuatu	47.7103	2
131	Virginian	0	1
132	West Greenland Shelf	0	1
133	Western and Northern Madagascar	88.2628	4
134	Western Arabian Sea	44.4794	2
135	Western Bassian	0	1
136	Western Caribbean	98.4915	4
137	Western India	0	1
138	Yellow Sea	0	1
139	Southern Java	80.1606	4
140	Western Sumatra	86.3365	4
141	Torres Strait Northern Great Barrier Reef	0	1
142	Central and Southern Great Barrier Reef	0	1
143	Sunda Shelf/Java Sea	0	1
144	North and East Iceland	0	1
145	South and West Iceland	0	1
146	North Sea	0	1
147	Southern Norway	0	1
148	Northern Norway and Finnmark	0	1
149	North and East Barents Sea	0	1
150	White Sea	0	1
151	Greater Antilles	88.8963	4
152	Gulf of Guinea South	0	1
153	Angolan	0	1
154	Sahelian Upwelling	0	1
155	Adriatic Sea	93.6652	4
156	Levantine Sea	97.303	4
157	Tunisian Plateau/Gulf of Sidra	0	1
158	Ionian Sea	96.2814	4
159	Aegean Sea	91.4787	4
160	Alboran Sea	86.5923	4
161	Western Mediterranean	96.3214	4

## Sheet: 6 ICVI
ICVI calculations, round values at each step
*Grouping determined by quartile binning of 2023 FWI and 2020 population data, same vulnerability score thresholds held constant for 2100 data
FWI = fire weather index		Factor	Weight	Rounding thresholds		Total # ecoregions	162
COMFISH = commercial fishing		FWI	0.75	1.5
MBH = marine biodiversity hotspots		MBH	0.25	2.5		Vulnerability score	% scen 2 2023	% scen 2 2100
POP = popultation count		POP	0.5	3.5		1	0.228395	0.148148
INSEA = indigenous seafood consumption		COMFISH	0.5			2	0.469136	0.5
MPA = marine protected area						3	0.271605	0.277778
						4	0.0308642	0.0740741
Vulnerability score	Vulnerability score description	sum FWI group limit*	POP group limit*	COMFISH group limit	MBH group limit
1	1 = Low	75343	306630	190693	25
2	2 = Low to moderate	218607	887968	514818	50
3	3 = Moderate to high	361871	1469306	838944	75
4	4 = High
			Factors - original data							Vulnerability scores for each factor							PVI calculations			SVI calculations			ICVI calculations
FID	Ecoregion	Primary_country	pop_2020	pop_2100	comfish	mbh_percov	fwi2023sum	fwi2100sum		pop2020_vul	pop2100_vul	comfish_vul	mbh_vul	fwi2023_vul	fwi2100_vul		s2_pvi2023	s2_pvi2100		s2_svi2023	s2_svi2100		s2_icvi2023	s2_icvi2100	s2_2100-2023	s2_change
0	Agulhas Bank	South Africa	182434	137622	29161	0	45722	80929		1	1	1	1	1	2		1	2		1	1		1	2	1	Increase
1	Aleutian Islands	USA	1692	15	154104	0	0	71		1	1	1	1	1	1		1	1		1	1		1	1	0	No change
2	Amazonia	Brazil	577312	1116290	245698	0	88586	320431		2	3	2	1	2	3		2	3		2	3		2	3	1	Increase
3	Andaman Sea Coral Coast	India	587522	315210	1194916	96.3518	121893	368473		2	2	4	4	2	4		3	4		3	3		3	4	1	Increase
4	Arabian (Persian) Gulf	Iran	2330441	2692759	142801	0	2046799	2355597		4	4	1	1	4	4		3	3		3	3		3	3	0	No change
5	Araucanian	Chile	183921	153924	28453	98.86	47106	92975		1	1	1	4	1	2		2	3		1	1		2	2	0	No change
6	Arnhem Coast to Gulf of Carpenteria	Australia	10734	1463	220250	0.0888	711384	1002369		1	1	2	1	4	4		3	3		2	2		3	3	0	No change
7	Arafura Sea	Indonesia	29730	23430	843586	0.779254	11540	42568		1	1	4	1	1	1		1	1		3	3		2	2	0	No change
8	Baffin Bay - Davis Strait	Canada	89	106	93154	0	989	59792		1	1	1	1	1	1		1	1		1	1		1	1	0	No change
9	Bahamian	Bahamas	168376	131779	45791	69.8956	172326	341649		1	1	1	3	2	3		2	3		1	1		2	2	0	No change
10	Baltic Sea	Sweden	1117218	1154089	19221	0	93795	386542		3	3	1	1	2	4		2	3		2	2		2	3	1	Increase
11	Banda Sea	Indonesia	793245	689775	983802	97.6607	106043	437893		2	2	4	4	2	4		3	4		3	3		3	4	1	Increase
12	Bassian	Australia	174888	251290	24878	0	45932	118913		1	1	1	1	1	2		1	2		1	1		1	2	1	Increase
13	Beaufort-Amundsen-Viscount Melville-Queen Maud	Canada	1846	215	146	0	9668	416970		1	1	1	1	1	4		1	3		1	1		1	2	1	Increase
14	Beaufort Sea - continental coast and shelf	USA	388	2	45	0	18396	81287		1	1	1	1	1	2		1	2		1	1		1	2	1	Increase
15	Bismarck Sea	Papua New Guinea	134789	109904	31593	57.8624	0	49419		1	1	1	3	1	1		2	2		1	1		2	2	0	No change
16	Black Sea	Turkey	471140	741704	21052	0	174903	489120		2	2	1	1	2	4		2	3		2	2		2	3	1	Increase
17	Bonaparte Coast	Australia	8932	19533	331185	8.3851	701803	942225		1	1	2	1	4	4		3	3		2	2		3	3	0	No change
18	Cape Howe	Australia	27133	12153	19378	0	35740	85585		1	1	1	1	1	2		1	2		1	1		1	2	1	Increase
19	Carolinian	USA	135206	185628	93465	0	11170	31389		1	1	1	1	1	1		1	1		1	1		1	1	0	No change
20	Celtic Seas	UK	836225	1228508	1167917	0	15356	96232		2	3	4	1	1	2		1	2		3	4		2	3	1	Increase
21	Central Chile	Chile	41226	90897	18749	98.6831	185937	256922		1	1	1	4	2	3		3	3		1	1		2	2	0	No change
22	Central Kuroshio Current	Japan	3136265	1609514	521574	3.8e-05	14061	105589		4	4	3	1	1	2		1	2		4	4		3	3	0	No change
23	Central New Zealand	New Zealand	136020	185996	282304	98.0399	22986	54533		1	1	2	4	1	1		2	2		2	2		2	2	0	No change
24	Central Peru	Peru	671495	317091	98026	0	73638	78305		2	2	1	1	1	2		1	2		2	2		2	2	0	No change
25	Central Somali Coast	Somalia	2742	5786	20495	6.66533	243524	270154		1	1	1	1	3	3		3	3		1	1		2	2	0	No change
26	Channels and Fjords of Southern Chile	Chile	14852	683	231098	0.764258	15667	66291		1	1	2	1	1	1		1	1		2	2		2	2	0	No change
27	Chiapas-Nicaragua	Mexico	186299	213515	116234	98.9198	85307	147940		1	1	1	4	2	2		3	3		1	1		2	2	0	No change
28	Chiloense	Chile	65269	38732	131434	78.0232	0	47109		1	1	1	4	1	1		2	2		1	1		2	2	0	No change
29	Chukchi Sea	USA	554	2	120	0	964	63006		1	1	1	1	1	1		1	1		1	1		1	1	0	No change
30	Cortezian	Mexico	331910	122216	90000	25.2168	899359	1174207		2	1	1	2	4	4		4	4		2	1		3	3	0	No change
31	Delagoa	Mozambique	133338	376567	34904	0	52934	122993		1	2	1	1	1	2		1	2		1	2		1	2	1	Increase
32	East China Sea	China	10851110	4412854	4392014	41.9337	57449	214859		4	4	4	2	1	2		1	2		4	4		3	3	0	No change
33	East Greenland Shelf	Greenland	781	0	189408	0	56	73890		1	1	1	1	1	1		1	1		1	1		1	1	0	No change
34	East Siberian Sea	Russia	0	0	2	0	303	37750		1	1	1	1	1	1		1	1		1	1		1	1	0	No change
35	Eastern Bering Sea	USA	6715	561	5358271	0	0	66557		1	1	4	1	1	1		1	1		3	3		2	2	0	No change
36	Eastern Brazil	Brazil	1333710	2655428	286373	0	9219	56754		3	4	2	1	1	1		1	1		3	3		2	2	0	No change
37	Eastern India	India	639635	1984781	827983	0	141072	194481		2	4	3	1	2	2		2	2		3	4		3	3	0	No change
38	Eastern Philippines	Philippines	8380233	6929735	926653	68.4537	109570	545987		4	4	4	3	2	4		2	4		4	4		3	4	1	Increase
39	Exmouth to Broome	Australia	20369	357	231834	2.02268	628645	813934		1	1	2	1	4	4		3	3		2	2		3	3	0	No change
40	Fiji Islands	Fiji	98444	52492	14210	75.3656	48132	110024		1	1	1	4	1	2		2	3		1	1		2	2	0	No change
41	Floridian	USA	782643	1075033	87968	0	46198	93720		2	3	1	1	1	2		1	2		2	2		2	2	0	No change
42	Great Australian Bight	Australia	880	0	34957	0	190193	269565		1	1	1	1	2	3		2	3		1	1		2	2	0	No change
43	Guayaquil	Ecuador	535461	139299	134735	68.9412	47826	56621		2	1	1	3	1	1		2	2		2	1		2	2	0	No change
44	Guianan	Venezuela	157572	77066	100634	0	17167	140022		1	1	1	1	1	2		1	2		1	1		1	2	1	Increase
45	Gulf of Aden	Yemen	452749	535899	148686	65.7882	676532	752122		2	2	1	3	4	4		4	4		2	2		3	3	0	No change
46	Gulf of Alaska	USA	1389	1709	299219	0	0	8271		1	1	2	1	1	1		1	1		2	2		2	2	0	No change
47	Gulf of Guinea Central	Nigeria	2084795	4827466	341522	0	10921	40113		4	4	2	1	1	1		1	1		3	3		2	2	0	No change
48	Gulf of Guinea Upwelling	Cote D'Ivoire	1036415	872517	131689	0	4296	17388		3	2	1	1	1	1		1	1		2	2		2	2	0	No change
49	Gulf of Guinea West	Liberia	500728	450251	138921	0	241730	322894		2	2	1	1	3	3		3	3		2	2		3	3	0	No change
50	Gulf of Maine/Bay of Fundy	USA	208946	308845	228137	0	3063	35799		1	2	2	1	1	1		1	1		2	2		2	2	0	No change
51	Gulf of Oman	Iran	35829	57994	183943	0	439855	515418		1	1	1	1	4	4		3	3		1	1		2	2	0	No change
52	Gulf of Papua	Papua New Guinea	3091	6887	6642	0	883	12643		1	1	1	1	1	1		1	1		1	1		1	1	0	No change
53	Gulf of St. Lawrence - Eastern Scotian Shelf	Canada	139070	137619	265785	0	13223	46349		1	1	2	1	1	1		1	1		2	2		2	2	0	No change
54	Gulf of Thailand	Thailand	813496	417503	913081	96.0117	73234	218610		2	2	4	4	1	3		2	3		3	3		3	3	0	No change
55	Gulf of Tonkin	Vietnam	2988433	1509174	1424961	96.2639	57793	171326		4	4	4	4	1	2		2	3		4	4		3	4	1	Increase
56	Halmahera	Indonesia	397241	259691	195155	77.0052	3352	100054		2	1	2	4	1	2		2	3		2	2		2	3	1	Increase
57	Hawaii	USA	132371	157894	13260	86.5666	27486	57843		1	1	1	4	1	1		2	2		1	1		2	2	0	No change
58	Houtman	Australia	1292	2960	6211	0	80234	116849		1	1	1	1	2	2		2	2		1	1		2	2	0	No change
59	Hudson Complex	Canada	10194	3858	2788	0	753	281350		1	1	1	1	1	3		1	3		1	1		1	2	1	Increase
60	Humboldtian	Peru	600558	697982	150316	89.3808	280530	330036		2	2	1	4	3	3		3	3		2	2		3	3	0	No change
61	Kamchatka Shelf and Coast	Russia	2243	0	298512	0	0	9078		1	1	2	1	1	1		1	1		2	2		2	2	0	No change
62	Kara Sea	Russia	0	0	111	0	0	106941		1	1	1	1	1	2		1	2		1	1		1	2	1	Increase
63	Lancaster Sound	Canada	0	18	1649	0	0	133175		1	1	1	1	1	2		1	2		1	1		1	2	1	Increase
64	Laptev Sea	Russia	0	0	0	0	0	68354		1	1	1	1	1	1		1	1		1	1		1	1	0	No change
65	Leeuwin	Australia	83361	54108	18579	0	164884	273294		1	1	1	1	2	3		2	3		1	1		2	2	0	No change
66	Lesser Sunda	Indonesia	1173864	822390	507320	65.0659	239621	575849		3	2	2	3	3	4		3	4		3	2		3	3	0	No change
67	Magdalena Transition	Mexico	5481	1215	21655	0	148943	186242		1	1	1	1	2	2		2	2		1	1		2	2	0	No change
68	Malacca Strait	Indonesia	3294455	2368961	985984	91.5834	614	24460		4	4	4	4	1	1		2	2		4	4		3	3	0	No change
69	Malvinas/Falklands	Falkland Islands	105	3	164175	0	20162	41485		1	1	1	1	1	1		1	1		1	1		1	1	0	No change
70	Manning-Hawkesbury	Australia	114456	99421	21246	0	6859	20859		1	1	1	1	1	1		1	1		1	1		1	1	0	No change
71	Mexican Tropical Pacific	Mexico	326994	95554	118684	92.9834	78138	120465		2	1	1	4	2	2		3	3		2	1		3	2	-1	Decrease
72	Namaqua	South Africa	40483	23502	27883	0	202987	259837		1	1	1	1	2	3		2	3		1	1		2	2	0	No change
73	Namib	Namibia	3398	4589	56924	0	252389	306045		1	1	1	1	3	3		3	3		1	1		2	2	0	No change
74	Natal	South Africa	174256	167568	18443	0	20848	41159		1	1	1	1	1	1		1	1		1	1		1	1	0	No change
75	New Caledonia	New Caledonia	43075	54289	16222	32.4765	66843	110851		1	1	1	2	1	2		1	2		1	1		1	2	1	Increase
76	Nicoya	Costa Rica	42340	66807	103323	98.9385	10405	44387		1	1	1	4	1	1		2	2		1	1		2	2	0	No change
77	Ningaloo	Australia	164	0	3390	0	43592	59319		1	1	1	1	1	1		1	1		1	1		1	1	0	No change
78	North American Pacific Fijordland	Canada	20566	28892	89227	0	0	6421		1	1	1	1	1	1		1	1		1	1		1	1	0	No change
79	North Greenland	Greenland	0	0	116866	0	11730	134942		1	1	1	1	1	2		1	2		1	1		1	2	1	Increase
80	North Patagonian Gulfs	Argentina	8582	3396	278512	0	236296	325697		1	1	2	1	3	3		3	3		2	2		3	3	0	No change
81	Northeast Sulawesi	Indonesia	121948	71827	123324	89.8489	3534	52947		1	1	1	4	1	1		2	2		1	1		2	2	0	No change
82	Northeastern Brazil	Brazil	1020079	1042269	517296	0	97519	179388		3	3	3	1	2	2		2	2		3	3		3	3	0	No change
83	Northeastern Honshu	Japan	152053	77097	132495	48.1428	0	7186		1	1	1	2	1	1		1	1		1	1		1	1	0	No change
84	Northeastern New Zealand	New Zealand	90027	89735	26001	98.5409	21637	43564		1	1	1	4	1	1		2	2		1	1		2	2	0	No change
85	Northern and Central Red Sea	Saudi Arabia	271009	83819	134106	7.99901	1805658	2034842		1	1	1	1	4	4		3	3		1	1		2	2	0	No change
86	Northern Bay of Bengal	Burma	2851835	2568617	1102572	32.6496	338717	525128		4	4	4	2	3	4		3	4		4	4		4	4	0	No change
87	Northern California	USA	381150	570723	136353	39.2315	95618	142917		2	2	1	2	2	2		2	2		2	2		2	2	0	No change
88	Northern Grand Banks - Southern Labrador	Canada	36156	42123	508163	0	0	20240		1	1	2	1	1	1		1	1		2	2		2	2	0	No change
89	Northern Gulf of Mexico	USA	369443	546167	156207	0.154069	129343	304352		2	2	1	1	2	3		2	3		2	2		2	3	1	Increase
90	Northern Labrador	Canada	256	75	282541	0	0	28144		1	1	2	1	1	1		1	1		2	2		2	2	0	No change
91	Oregon, Washington, Vancouver Coast and Shelf	USA	147459	151449	50832	3.18238	23113	56274		1	1	1	1	1	1		1	1		1	1		1	1	0	No change
92	Oyashio Current	Russia	7754	3737	771605	2.85915	0	13856		1	1	3	1	1	1		1	1		2	2		2	2	0	No change
93	Palawan/North Borneo	Philippines	1853299	1699692	1204541	0	64568	337792		4	4	4	1	1	3		1	3		4	4		3	4	1	Increase
94	Panama Bight	Colombia	121420	74008	141672	98.3824	573	14960		1	1	1	4	1	1		2	2		1	1		2	2	0	No change
95	Papua	Indonesia	115467	60929	388658	0.498072	0	50407		1	1	2	1	1	1		1	1		2	2		2	2	0	No change
96	Patagonian Shelf	Argentina	2053	458	1072844	0	61123	109535		1	1	4	1	1	2		1	2		3	3		2	3	1	Increase
97	Puget Trough/Georgia Basin	Canada	433758	691436	4401	0	12479	62126		2	2	1	1	1	1		1	1		2	2		2	2	0	No change
98	Rio de la Plata	Uruguay	513151	86965	19656	0	17133	39561		2	1	1	1	1	1		1	1		2	1		2	1	-1	Decrease
99	Rio Grande	Brazil	285972	201371	73042	0	1304	12243		1	1	1	1	1	1		1	1		1	1		1	1	0	No change
100	Saharan Upwelling	Morocco	676980	701059	294845	70.1502	476557	586954		2	2	2	3	4	4		4	4		2	2		3	3	0	No change
101	Scotian Shelf	Canada	50387	59268	145580	0	3342	17136		1	1	1	1	1	1		1	1		1	1		1	1	0	No change
102	Sea of Japan	Russia	914997	663781	1295666	32.5049	13062	93792		3	2	4	2	1	2		1	2		4	3		3	3	0	No change
103	Sea of Okhotsk	Russia	11355	5737	6249191	2.8002	709	51262		1	1	4	1	1	1		1	1		3	3		2	2	0	No change
104	Shark Bay	Australia	0	0	7253	0	268432	356676		1	1	1	1	3	3		3	3		1	1		2	2	0	No change
105	Solomon Archipelago	Solomon Islands	222442	195172	38493	61.3892	0	41433		1	1	1	3	1	1		2	2		1	1		2	2	0	No change
106	Solomon Sea	Papua New Guinea	76421	74748	26993	22.8483	9924	44514		1	1	1	1	1	1		1	1		1	1		1	1	0	No change
107	South Australian Gulfs	Australia	46294	55015	22528	0	278995	432971		1	1	1	1	3	4		3	3		1	1		2	2	0	No change
108	South European Atlantic Shelf	France	880531	919609	332596	27.9392	86575	232174		2	3	2	2	2	3		2	3		2	3		2	3	1	Increase
109	South India and Sri Lanka	Sri Lanka	1089956	1566670	573440	0	112160	171226		3	4	3	1	2	2		2	2		3	4		3	3	0	No change
110	South Kuroshio	Japan	494844	307338	1121426	64.1995	28511	76620		2	2	4	3	1	2		2	2		3	3		3	3	0	No change
111	Southeast Madagascar	Madagascar	32322	76187	83237	91.1173	12178	40138		1	1	1	4	1	1		2	2		1	1		2	2	0	No change
112	Southeast Papua New Guinea	Papua New Guinea	50895	67895	3074	0	820	10155		1	1	1	1	1	1		1	1		1	1		1	1	0	No change
113	Southeastern Brazil	Brazil	1792891	1712892	143388	0	4243	25166		4	4	1	1	1	1		1	1		3	3		2	2	0	No change
114	Southern California Bight	Mexico	321461	508219	61406	41.2305	358284	448374		2	2	1	2	3	4		3	4		2	2		3	3	0	No change
115	Southern Caribbean	Venezuela	444216	431651	94261	52.721	174583	429160		2	2	1	3	2	4		2	4		2	2		2	3	1	Increase
116	Southern China	China	7710824	4277447	2257631	62.2726	59893	162811		4	4	4	3	1	2		2	2		4	4		3	3	0	No change
117	Southern Grand Banks - South Newfoundland	Canada	5771	7675	405544	0	0	7381		1	1	2	1	1	1		1	1		2	2		2	2	0	No change
118	Southern Gulf of Mexico	Mexico	248356	112123	428012	22.1087	51351	144276		1	1	2	1	1	2		1	2		2	2		2	2	0	No change
119	Southern New Zealand	New Zealand	20862	38189	111393	98.7678	219	1710		1	1	1	4	1	1		2	2		1	1		2	2	0	No change
120	Southern Red Sea	Saudi Arabia	391313	715555	60362	90.1417	1647635	1896230		2	2	1	4	4	4		4	4		2	2		3	3	0	No change
121	Southern Vietnam	Vietnam	1446311	936124	843090	96.1451	38101	120809		3	3	4	4	1	2		2	3		4	4		3	4	1	Increase
122	Southwestern Caribbean	Colombia	506105	241178	75527	38.7111	26670	101084		2	1	1	2	1	2		1	2		2	1		2	2	0	No change
123	Sulawesi Sea/Makassar Strait	Indonesia	1107195	739922	1162878	0	38160	211450		3	2	4	1	1	2		1	2		4	3		3	3	0	No change
124	East African Coral Coast	Tanzania	719235	1707928	103753	1.83286	156800	274022		2	4	1	1	2	3		2	3		2	3		2	3	1	Increase
125	Northern Monsoon Current Coast	Somalia	101931	441924	12195	0	83375	104340		1	2	1	1	2	2		2	2		1	2		2	2	0	No change
126	Bight of Sofala/Swamp Coast	Mozambique	116096	208013	45330	0	50875	114917		1	1	1	1	1	2		1	2		1	1		1	2	1	Increase
127	Three Kings-North Cape	New Zealand	0	136	20285	99.8933	2419	3611		1	1	1	4	1	1		2	2		1	1		2	2	0	No change
128	Tweed-Moreton	Australia	180611	258264	23386	0	23412	61232		1	1	1	1	1	1		1	1		1	1		1	1	0	No change
129	Uruguay-Buenos Aires Shelf	Argentina	10733	10285	359563	0	89207	133948		1	1	2	1	2	2		2	2		2	2		2	2	0	No change
130	Vanuatu	Vanuatu	103294	77844	9806	47.7103	31321	67051		1	1	1	2	1	1		1	1		1	1		1	1	0	No change
131	Virginian	USA	2181293	3522022	356500	0	28770	100367		4	4	2	1	1	2		1	2		3	3		2	3	1	Increase
132	West Greenland Shelf	Greenland	7291	3560	619718	0	0	25432		1	1	3	1	1	1		1	1		2	2		2	2	0	No change
133	Western and Northern Madagascar	Madagascar	344257	417012	215156	88.2628	214413	399622		2	2	2	4	2	4		3	4		2	2		3	3	0	No change
134	Western Arabian Sea	Oman	27448	34842	79232	44.4794	458299	539795		1	1	1	2	4	4		4	4		1	1		3	3	0	No change
135	Western Bassian	Australia	2684	4146	24048	0	45609	84991		1	1	1	1	1	2		1	2		1	1		1	2	1	Increase
136	Western Caribbean	Mexico	177955	141205	141936	98.4915	40971	143440		1	1	1	4	1	2		2	3		1	1		2	2	0	No change
137	Western India	India	7689485	8261492	1693786	0	557746	655723		4	4	4	1	4	4		3	3		4	4		4	4	0	No change
138	Yellow Sea	China	4294816	1343009	1716692	0	212010	456083		4	3	4	1	2	4		2	3		4	4		3	4	1	Increase
139	Southern Java	Indonesia	1584173	608823	276485	80.1606	11018	74107		4	2	2	4	1	1		2	2		3	2		3	2	-1	Decrease
140	Western Sumatra	Indonesia	375717	373956	562447	86.3365	4828	38843		2	2	3	4	1	1		2	2		3	3		3	3	0	No change
141	Torres Strait Northern Great Barrier Reef	Australia	4345	2395	17032	0	118786	184108		1	1	1	1	2	2		2	2		1	1		2	2	0	No change
142	Central and Southern Great Barrier Reef	Australia	29068	24877	23945	0	162088	342104		1	1	1	1	2	3		2	3		1	1		2	2	0	No change
143	Sunda Shelf/Java Sea	Indonesia	2740980	2196146	6946093	0	33691	287843		4	4	4	1	1	3		1	3		4	4		3	4	1	Increase
144	North and East Iceland	Iceland	463	27	333989	0	0	3407		1	1	2	1	1	1		1	1		2	2		2	2	0	No change
145	South and West Iceland	Iceland	19287	32552	670105	0	0	16386		1	1	3	1	1	1		1	1		2	2		2	2	0	No change
146	North Sea	UK	1399563	1685653	1974488	0	52134	212191		3	4	4	1	1	2		1	2		4	4		3	3	0	No change
147	Southern Norway	Norway	206561	271819	468927	0	0	5956		1	1	2	1	1	1		1	1		2	2		2	2	0	No change
148	Northern Norway and Finnmark	Norway	25593	38189	397325	0	0	21385		1	1	2	1	1	1		1	1		2	2		2	2	0	No change
149	North and East Barents Sea	Russia	0	0	1595385	0	47	158022		1	1	4	1	1	2		1	2		3	3		2	3	1	Increase
150	White Sea	Russia	12434	31	19337	0	0	39498		1	1	1	1	1	1		1	1		1	1		1	1	0	No change
151	Greater Antilles	Cuba	1437830	992653	141851	88.8963	290747	775977		3	3	1	4	3	4		3	4		2	2		3	3	0	No change
152	Gulf of Guinea South	Gabon	34569	42760	53263	0	21340	40310		1	1	1	1	1	1		1	1		1	1		1	1	0	No change
153	Angolan	Angola	496663	274577	279442	0	93271	128643		2	1	2	1	2	2		2	2		2	2		2	2	0	No change
154	Sahelian Upwelling	Mauritania	351117	855771	102893	0	333464	385051		2	2	1	1	3	4		3	3		2	2		3	3	0	No change
155	Adriatic Sea	Italy	782630	429620	129339	93.6652	90795	301305		2	2	1	4	2	3		3	3		2	2		3	3	0	No change
156	Levantine Sea	Egypt	2827621	2677782	88770	97.303	445264	634512		4	4	1	4	4	4		4	4		3	3		4	4	0	No change
157	Tunisian Plateau/Gulf of Sidra	Libya	403133	306138	80800	0	366965	508421		2	1	1	1	4	4		3	3		2	1		3	2	-1	Decrease
158	Ionian Sea	Italy	381409	157516	93423	96.2814	231722	423866		2	1	1	4	3	4		3	4		2	1		3	3	0	No change
159	Aegean Sea	Greece	1150992	805357	268804	91.4787	1048001	1781435		3	2	2	4	4	4		4	4		3	2		4	3	-1	Decrease
160	Alboran Sea	Spain	411935	301819	39053	86.5923	114037	201745		2	1	1	4	2	2		3	3		2	1		3	2	-1	Decrease
161	Western Mediterranean	Italy	2851048	2524769	166631	96.3214	369127	761288		4	4	1	4	4	4		4	4		3	3		4	4	0	No change

## Sheet: 7 ICVI w indig seafood consumpt
FID	ICVI 2023	ICVI 2100	Indigenous seafood consumption grouping	Indigenous seafood consumption "vulnerability score"				Year 2023	Year 2100
0	1	2	0 to 1,000	1			# ICVI 3-4	49	57
1	1	1	0 to 1,000	1			# ecoregions with INSFD >1000	16	20
2	2	3	0 to 1,000	1			% ecoregions with INSFD >1000	0.326531	0.350877
3	3	4	0 to 1,000	1
4	3	3	1,000 to 2,500	2
5	2	2	>5,000	4
6	3	3	1,000 to 2,500	2
7	2	2	0 to 1,000	1
8	1	1	0 to 1,000	1
9	2	2	0 to 1,000	1
10	2	3	0 to 1,000	1
11	3	4	0 to 1,000	1
12	1	2	0 to 1,000	1
13	1	2	0 to 1,000	1
14	1	2	0 to 1,000	1
15	2	2	0 to 1,000	1
16	2	3	>5,000	4
17	3	3	0 to 1,000	1
18	1	2	0 to 1,000	1
19	1	1	0 to 1,000	1
20	2	3	0 to 1,000	1
21	2	2	0 to 1,000	1
22	3	3	0 to 1,000	1
23	2	2	>5,000	4
24	2	2	0 to 1,000	1
25	2	2	0 to 1,000	1
26	2	2	0 to 1,000	1
27	2	2	>5,000	4
28	2	2	1,000 to 2,500	2
29	1	1	1,000 to 2,500	2
30	3	3	2,500 to 5,000	3
31	1	2	0 to 1,000	1
32	3	3	0 to 1,000	1
33	2	2	0 to 1,000	1
34	1	1	0 to 1,000	1
35	2	2	0 to 1,000	1
36	2	2	0 to 1,000	1
37	3	3	0 to 1,000	1
38	3	4	0 to 1,000	1
39	3	3	0 to 1,000	1
40	2	2	>5,000	4
41	2	2	1,000 to 2,500	2
42	2	2	0 to 1,000	1
43	2	2	0 to 1,000	1
44	1	2	2,500 to 5,000	3
45	3	3	0 to 1,000	1
46	2	2	0 to 1,000	1
47	2	2	>5,000	4
48	2	2	>5,000	4
49	3	3	>5,000	4
50	2	2	0 to 1,000	1
51	2	2	0 to 1,000	1
52	1	1	>5,000	4
53	2	2	2,500 to 5,000	3
54	3	3	>5,000	4
55	3	4	>5,000	4
56	2	3	>5,000	4
57	2	2	>5,000	4
58	2	2	0 to 1,000	1
59	1	2	1,000 to 2,500	2
60	3	3	0 to 1,000	1
61	2	2	0 to 1,000	1
62	1	2	0 to 1,000	1
63	1	2	0 to 1,000	1
64	1	1	2,500 to 5,000	3
65	2	2	0 to 1,000	1
66	3	3	>5,000	4
67	2	2	0 to 1,000	1
68	3	3	0 to 1,000	1
69	1	1	0 to 1,000	1
70	1	1	0 to 1,000	1
71	3	2	2,500 to 5,000	3
72	2	2	0 to 1,000	1
73	2	2	0 to 1,000	1
74	1	1	0 to 1,000	1
75	1	2	2,500 to 5,000	3
76	2	2	0 to 1,000	1
77	1	1	0 to 1,000	1
78	1	1	1,000 to 2,500	2
79	1	2	0 to 1,000	1
80	3	3	0 to 1,000	1
81	2	2	0 to 1,000	1
82	3	3	0 to 1,000	1
83	1	1	0 to 1,000	1
84	2	2	0 to 1,000	1
85	2	2	0 to 1,000	1
86	4	4	>5,000	4
87	2	2	0 to 1,000	1
88	2	2	0 to 1,000	1
89	2	3	1,000 to 2,500	2
90	2	2	0 to 1,000	1
91	1	1	1,000 to 2,500	2
92	2	2	0 to 1,000	1
93	3	4	1,000 to 2,500	2
94	2	2	0 to 1,000	1
95	2	2	0 to 1,000	1
96	2	3	0 to 1,000	1
97	2	2	2,500 to 5,000	3
98	2	1	0 to 1,000	1
99	1	1	>5,000	4
100	3	3	0 to 1,000	1
101	1	1	0 to 1,000	1
102	3	3	2,500 to 5,000	3
103	2	2	>5,000	4
104	2	2	0 to 1,000	1
105	2	2	>5,000	4
106	1	1	0 to 1,000	1
107	2	2	0 to 1,000	1
108	2	3	0 to 1,000	1
109	3	3	0 to 1,000	1
110	3	3	0 to 1,000	1
111	2	2	>5,000	4
112	1	1	0 to 1,000	1
113	2	2	0 to 1,000	1
114	3	3	0 to 1,000	1
115	2	3	>5,000	4
116	3	3	0 to 1,000	1
117	2	2	0 to 1,000	1
118	2	2	>5,000	4
119	2	2	0 to 1,000	1
120	3	3	>5,000	4
121	3	4	0 to 1,000	1
122	2	2	>5,000	4
123	3	3	2,500 to 5,000	3
124	2	3	>5,000	4
125	2	2	>5,000	4
126	1	2	0 to 1,000	1
127	2	2	0 to 1,000	1
128	1	1	0 to 1,000	1
129	2	2	0 to 1,000	1
130	1	1	2,500 to 5,000	3
131	2	3	0 to 1,000	1
132	2	2	>5,000	4
133	3	3	>5,000	4
134	3	3	0 to 1,000	1
135	1	2	0 to 1,000	1
136	2	2	>5,000	4
137	4	4	>5,000	4
138	3	4	0 to 1,000	1
139	3	2	0 to 1,000	1
140	3	3	0 to 1,000	1
141	2	2	0 to 1,000	1
142	2	2	0 to 1,000	1
143	3	4	0 to 1,000	1
144	2	2	0 to 1,000	1
145	2	2	0 to 1,000	1
146	3	3	0 to 1,000	1
147	2	2	0 to 1,000	1
148	2	2	>5,000	4
149	2	3	0 to 1,000	1
150	1	1	0 to 1,000	1
151	3	3	0 to 1,000	1
152	1	1	0 to 1,000	1
153	2	2	>5,000	4
154	3	3	>5,000	4
155	3	3	0 to 1,000	1
156	4	4	0 to 1,000	1
157	3	2	0 to 1,000	1
158	3	3	0 to 1,000	1
159	4	3	0 to 1,000	1
160	3	2	0 to 1,000	1
161	4	4	0 to 1,000	1
